# Supplementary material for: Multistimuli-responsive materials based on two pyridinium ion-based complexes and their applications in tetracycline degradation and information anticounterfeiting
Source: Royal Society of Chemistry journal article supplement (doi:10.1039/d5tc00846h), 2025-01-01
Supplement: d5tc00846h1.pdf [file d5tc00846h1.pdf]

# Multistimuli-responsive materials of two pyridinium ion-based complexes and their applications in tetracycline degradation and information anticounterfeiting

Dong-Dong Yang,<sup>†,\*a</sup> Jian-Hua Xue,<sup>‡,a</sup> Shu-Tao Li,<sup>a</sup> Xiao-Ting Guo,<sup>a</sup> Yuan-Yu Yang,<sup>\*a</sup> Peng-Yi Ma,<sup>a</sup> Yong-Sheng Shi,<sup>b</sup> and Qi Ma<sup>\*ac</sup>

## Content

### 1. Materials and methods

#### 1.1 Materials and instrumentation

#### 1.2 The preparation of complexes **1** and **2** working electrode

#### 1.3 The degradation process of tetracycline by complex **1**

**Fig. S1** The PXRD of **1** (a) and **2** (b).

**Fig. S2** The TGA of **1** (a) and **2** (b).

**Fig. S3** The IR spectra of complexes **1** and **2** before and after irradiation and after fading.

**Fig. S4** The possible electron transfer pathways of complexes **1** and **2**.

**Fig. S5** Preparation flow chart of electrochromic device.

**Fig. S6** The suspensions of complex **1** have photoluminescence properties at room temperature.

**Fig. S7** Interference of different anions in solution with  $\text{Cr}_2\text{O}_7^{2-}$ .

**Fig. S8** The PXRD of **1** and after  $\text{Cr}_2\text{O}_7^{2-}$  treatment.

**Fig. S9** UV spectra of complex **1** and  $\text{Cr}_2\text{O}_7^{2-}$ .

**Fig. S10** UV-Vis absorption spectra of the catalytic degradation of TC by complex **1** driven by xenon lamp.

**Table S1** Crystallographic data and structure refinement optimization parameters for complexes **1** and **2**.

**Table S2** Selected bond distances (Å) and angles (degree) of complexes **1** and **2**.

## **1. Materials and methods**

### **1.1 Materials and instrumentation**

All the reagents used in this work were commercially purchased and used without further purification. Crystal data were collected on a single crystal X-ray diffractometer (D8 FOCUS). Powder X-ray diffraction (PXRD) measurements were performed on a D8 DISCOVER powder X-ray diffractometer with Cu-K $\alpha$  radiation and  $5^\circ \leq 2\theta \leq 50^\circ$ . Thermogravimetric analysis was carried out on a NETZSCH TG209 F3 thermal analyzer, Germany, at a temperature of 30 ~ 500 °C under N<sub>2</sub> atmosphere with a ramp rate of 10 °C/min. Fluorescence spectra of the solid samples were performed on a fluorescence spectrophotometer (Cary Eclipse). Infrared data of solid samples were collected on a Fourier Transform Infrared (FTIR-650). Solid UV data were collected on a UV-visible spectrometer (SPECORD 210 plus) with BaSO<sub>4</sub> plates as standards. The cyclic voltammetric curves of the samples were measured using a double constant potentiostat (Chenhua CHI760E). Absorption values of tetracycline (TC) were recorded at a maximum wavelength of 357 nm using a UV-visible spectrophotometer (UV758CRT).

### **1.2 The preparation of complexes 1 and 2 working electrode**

A certain amount of poly(methyl methacrylate) and 35 mg (0.05 mmol) of acrylamide were added to 2 mL of propylene carbonate and stirred at 70 °C until complete dissolution to produce a blank gel, which was colorless and transparent. Electrochromic gels were synthesized by incorporating 10 mg complexes 1 and 2 into the blank gel, respectively. Subsequently, the electrochromic gel was encapsulated with ITO conductive glass, which functioned as a transparent conductive electrode.

### **1.3 The degradation process of tetracycline by complex 1**

The solution was then transferred to a tinfoil-wrapped 100 mL beaker covered with a filter sheet and placed under a 500 W xenon lamp (the filter sheet filters light sources with wavelengths less than 420 nm), after which the light source was turned on to carry out the photocatalytic reaction, and the photocatalytic reaction was carried out at 10min intervals by taking 5 mL of dispersion. The photocatalytic reaction was

carried out at 10 min intervals by taking 5 mL of the dispersion, and the reaction was stopped after 120 min, after which the upper solution was removed by centrifugation and the absorbance of the solution at 357 nm was detected by a UV spectrophotometer, and the degradation of tetracycline hydrochloride was investigated by repeating the experiment for several times.

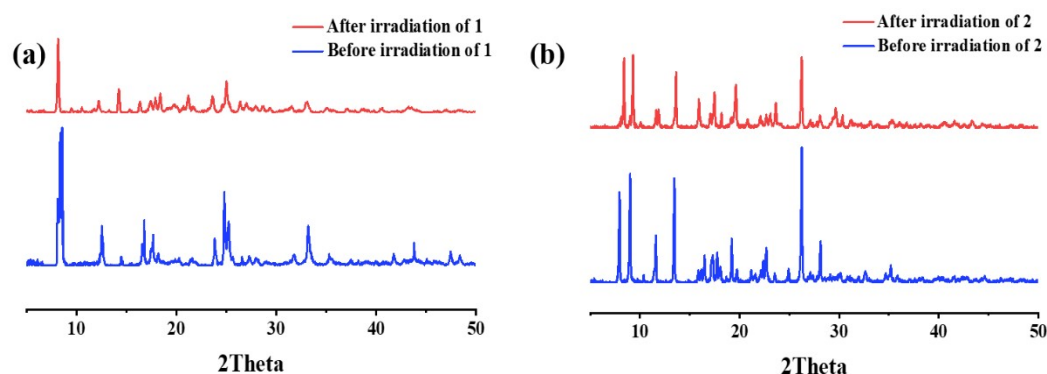

**Fig. S1** The PXRD of **1** (a) and **2** (b).

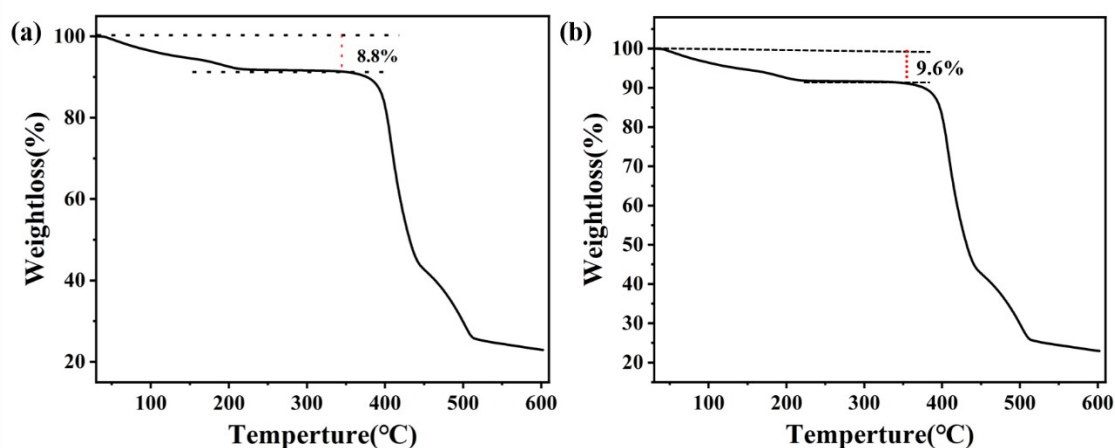

**Fig. S2** The TGA of **1** (a) and **2** (b).

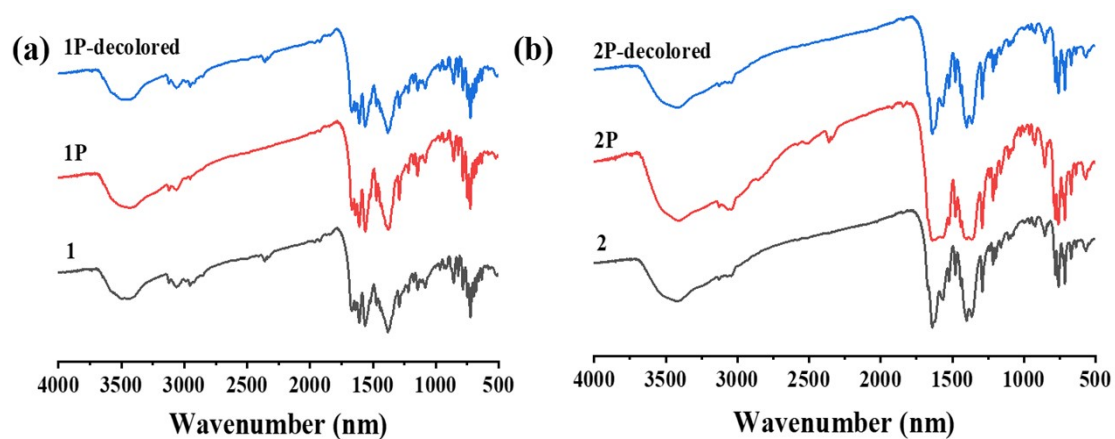

**Fig. S3** The IR spectra of complexes **1** and **2** before and after irradiation and after fading.

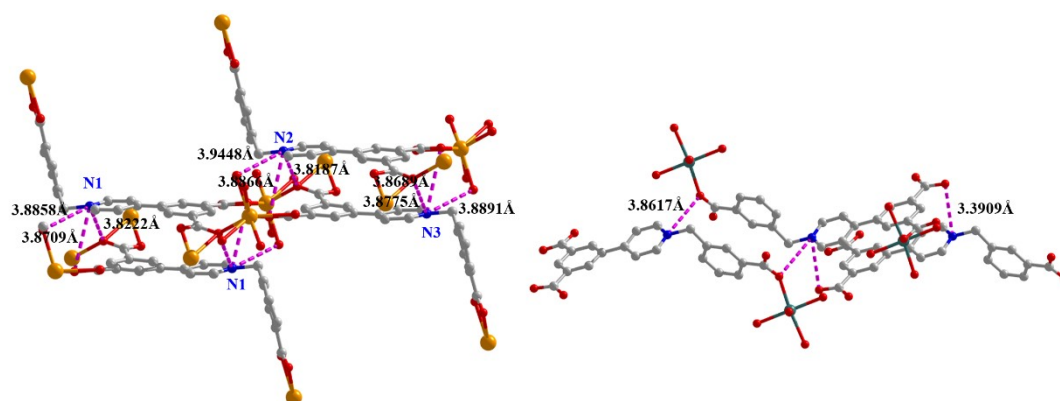

**Fig. S4** The possible electron transfer pathways of complexes **1** and **2**.

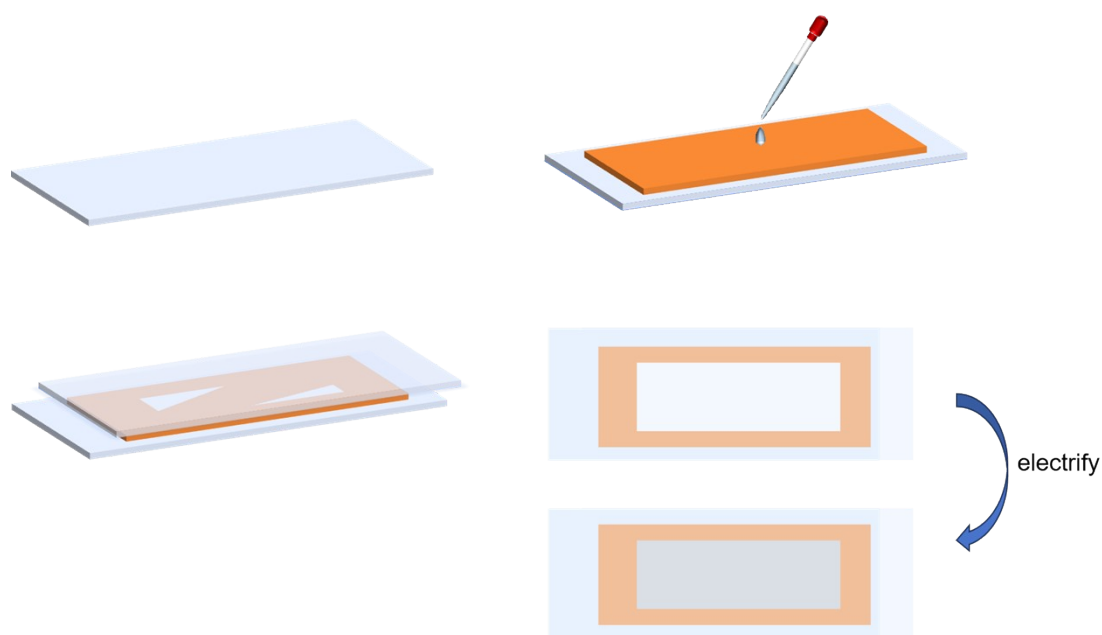

**Fig. S5** Preparation flow chart of electrochromic device.

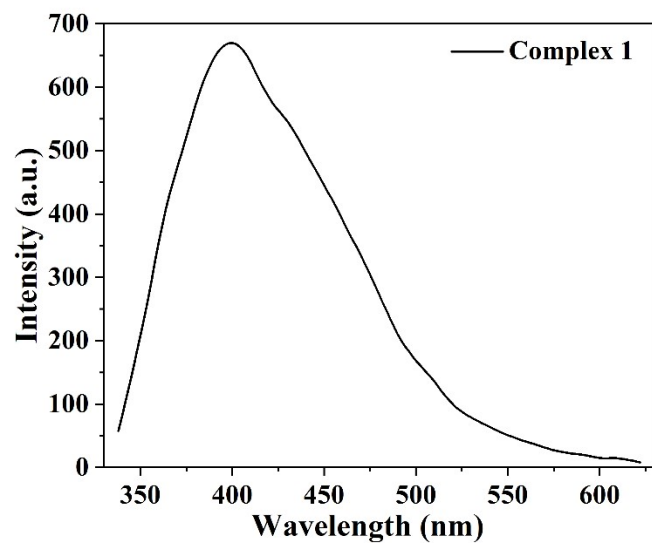

**Fig. S6** The suspensions of complex **1** have photoluminescence properties at room temperature.

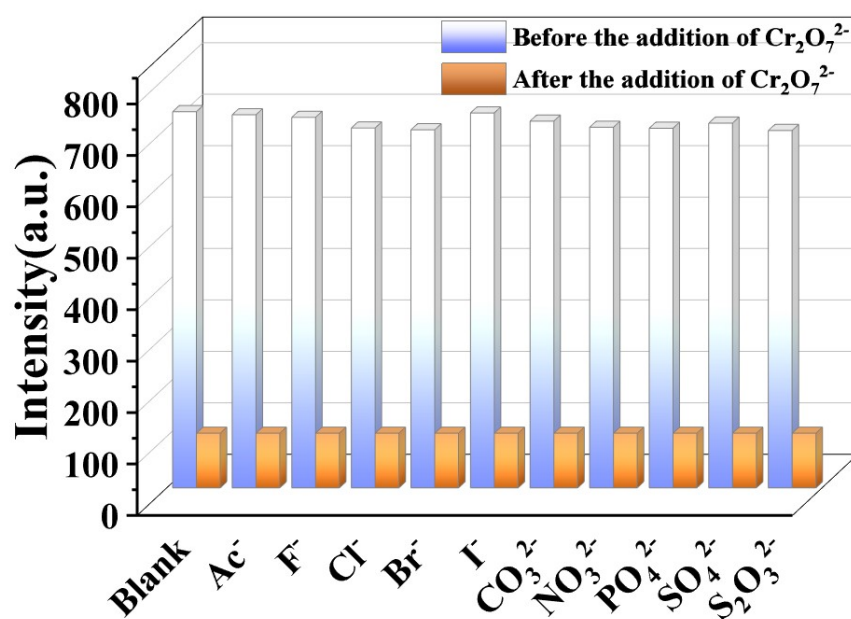

**Fig. S7** Interference of different anions in solution with  $\text{Cr}_2\text{O}_7^{2-}$  ions.

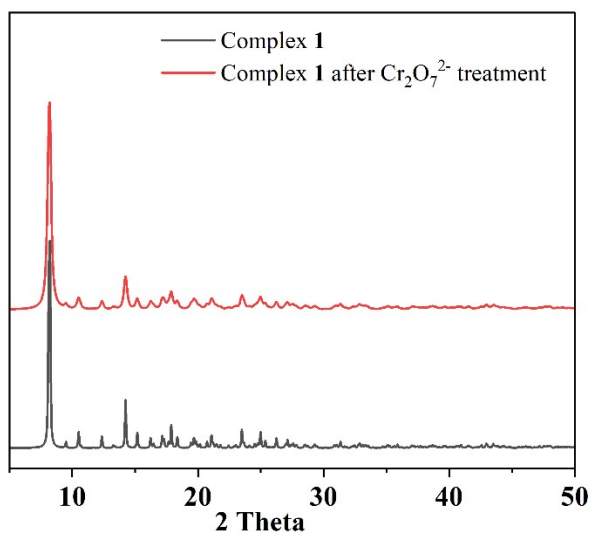

**Fig. S8** The PXRD of **1** and after Cr<sub>2</sub>O<sub>7</sub><sup>2-</sup> treatment.

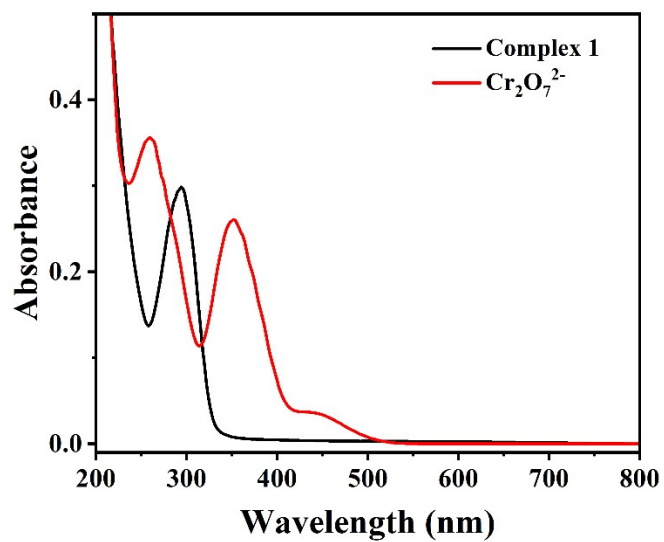

**Fig. S9** UV spectra of complex **1** and Cr<sub>2</sub>O<sub>7</sub><sup>2-</sup>.

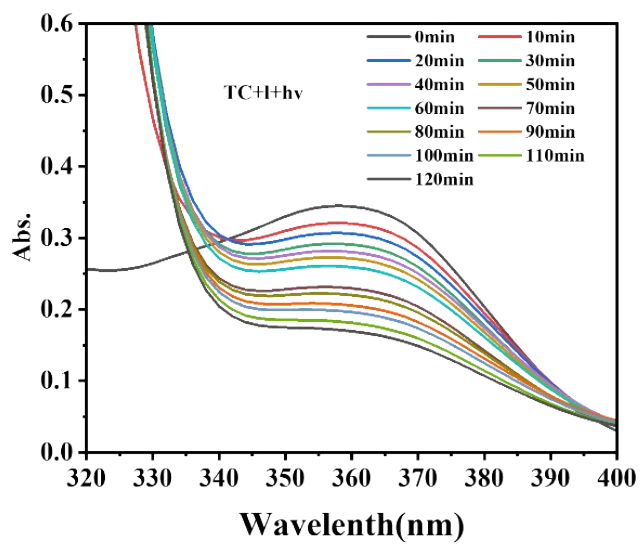

**Fig. S10** UV-Vis absorption spectra of the catalytic degradation of TC by complex **1** driven by xenon lamp.

**Table S1** Crystallographic data and structure refinement optimization parameters for complexes **1** and **2**.

| Complex                     | 1                                                                              | 2                                                  |
|-----------------------------|--------------------------------------------------------------------------------|----------------------------------------------------|
| Formula                     | C <sub>63</sub> H <sub>39</sub> Cd <sub>3</sub> N <sub>3</sub> O <sub>18</sub> | C <sub>21</sub> H <sub>25</sub> MnNO <sub>12</sub> |
| Mr                          | 1463.17                                                                        | 538.36                                             |
| Crystal system              | Triclinic                                                                      | Triclinic                                          |
| T (K)                       | 296                                                                            | 296                                                |
| a (Å)                       | 9.7951(6)                                                                      | 7.4959(7)                                          |
| b (Å)                       | 14.9487(10)                                                                    | 12.2572(11)                                        |
| c (Å)                       | 25.7483(17)                                                                    | 15.6005(15)                                        |
| α (°)                       | 104.032(2)°                                                                    | 77.314(3)°                                         |
| β (°)                       | 92.466(2)°                                                                     | 86.620(3)°                                         |
| γ (°)                       | 106.853(2)°                                                                    | 73.170(2)°                                         |
| V (Å <sup>3</sup> )         | 3474.4(4)                                                                      | 1338.5(2)                                          |
| Z                           | 2                                                                              | 2                                                  |
| Dx /Mg m <sup>-3</sup>      | 1.399                                                                          | 1.336                                              |
| F(000)                      | 1452                                                                           | 558                                                |
| μ(mm <sup>-1</sup> )        | 0.98                                                                           | 0.55                                               |
| GOF                         | 1.058                                                                          | 1.049                                              |
| R <sub>1</sub> [I > 2σ(I)]  | 0.062                                                                          | 0.061                                              |
| wR <sub>2</sub> [I > 2σ(I)] | 0.203                                                                          | 0.150                                              |

| Complex                 | 1       | 2       |
|-------------------------|---------|---------|
| <i>R</i> <sub>int</sub> | 0.051   | 0.077   |
| CCDC                    | 2420346 | 2420347 |

**Table S2** Selected bond distances (Å) and angles (degree) of complexes **1** and **2**.

|                                        |            |                                          |            |
|----------------------------------------|------------|------------------------------------------|------------|
| Cd1—O1                                 | 2.255 (8)  | Cd3—O6                                   | 2.256 (8)  |
| Cd1—O2                                 | 2.545 (8)  | Cd3—O8 <sup>iii</sup>                    | 2.216 (8)  |
| Cd1—O5 <sup>i</sup>                    | 2.222 (8)  | Cd3—O9                                   | 2.266 (7)  |
| Cd1—O7                                 | 2.263 (7)  | Cd3—O10                                  | 2.494 (7)  |
| Cd1—O11 <sup>ii</sup>                  | 2.415 (11) | Cd3—O13 <sup>iv</sup>                    | 2.440 (11) |
| Cd1—O12 <sup>ii</sup>                  | 2.291 (11) | Cd3—O14 <sup>iv</sup>                    | 2.305 (11) |
| Cd2—O3                                 | 2.261 (8)  | Cd2—O16 <sup>iv</sup>                    | 2.418 (10) |
| Cd2—O4                                 | 2.487 (8)  | Cd2—O17 <sup>v</sup>                     | 2.250 (9)  |
| Cd2—O15 <sup>iv</sup>                  | 2.260 (10) | Cd2—O18 <sup>iii</sup>                   | 2.284 (9)  |
| O1—Cd1—O2                              | 53.6 (3)   | O7—Cd1—O11 <sup>ii</sup>                 | 94.0 (3)   |
| O1—Cd1—O7                              | 86.2 (3)   | O7—Cd1—O12 <sup>ii</sup>                 | 122.5 (3)  |
| O1—Cd1—O11 <sup>ii</sup>               | 89.5 (3)   | O11 <sup>ii</sup> —Cd1—O2                | 103.4 (3)  |
| O1—Cd1—O12 <sup>ii</sup>               | 132.4 (4)  | O12 <sup>ii</sup> —Cd1—O2                | 100.8 (3)  |
| O5 <sup>i</sup> —Cd1—O1                | 113.8 (3)  | O12 <sup>ii</sup> —Cd1—O11 <sup>ii</sup> | 54.7 (3)   |
| O5 <sup>i</sup> —Cd1—O2                | 81.4 (3)   | O6—Cd3—O9                                | 84.7 (3)   |
| O5 <sup>i</sup> —Cd1—O7                | 101.3 (3)  | O6—Cd3—O10                               | 133.8 (3)  |
| O5 <sup>i</sup> —Cd1—O11 <sup>ii</sup> | 152.6 (3)  | O6—Cd3—O13 <sup>iv</sup>                 | 94.2 (3)   |
| O5 <sup>i</sup> —Cd1—O12 <sup>ii</sup> | 97.9 (3)   | O6—Cd3—O14 <sup>iv</sup>                 | 122.7 (3)  |
| O7—Cd1—O2                              | 135.2 (3)  | O6—Cd3—C50 <sup>iv</sup>                 | 109.3 (4)  |
| O8 <sup>iii</sup> —Cd3—O6              | 100.8 (3)  | O9—Cd3—O13 <sup>iv</sup>                 | 87.2 (3)   |
| O8 <sup>iii</sup> —Cd3—O9              | 115.5 (3)  | O9—Cd3—O14 <sup>iv</sup>                 | 133.1 (4)  |



|                                           |           |                                           |           |
|-------------------------------------------|-----------|-------------------------------------------|-----------|
| O8 <sup>iii</sup> —Cd3—O10                | 82.2 (3)  | O9—Cd3—C50 <sup>iv</sup>                  | 111.4 (4) |
| O8 <sup>iii</sup> —Cd3—O13 <sup>iv</sup>  | 153.6 (3) | O10—Cd3—C50 <sup>iv</sup>                 | 105.3 (4) |
| O8 <sup>iii</sup> —Cd3—O14 <sup>iv</sup>  | 97.2 (3)  | O13 <sup>iv</sup> —Cd3—O10                | 102.9 (3) |
| O8 <sup>iii</sup> —Cd3—C50 <sup>iv</sup>  | 125.8 (4) | O13 <sup>iv</sup> —Cd3—C50 <sup>iv</sup>  | 27.8 (3)  |
| O9—Cd3—O10                                | 54.2 (2)  | O14 <sup>iv</sup> —Cd3—O10                | 102.2 (3) |
| O14 <sup>iv</sup> —Cd3—O13 <sup>iv</sup>  | 56.4 (3)  | O3—Cd2—O4                                 | 53.3 (3)  |
| O14 <sup>iv</sup> —Cd3—C50 <sup>iv</sup>  | 28.6 (3)  | O3—Cd2—O16 <sup>iv</sup>                  | 89.4 (3)  |
| O15 <sup>iv</sup> —Cd2—O3                 | 132.5 (4) | O3—Cd2—O18 <sup>iii</sup>                 | 114.7 (4) |
| O15 <sup>iv</sup> —Cd2—O4                 | 101.7 (3) | O3—Cd2—C44 <sup>iv</sup>                  | 112.5 (4) |
| O15 <sup>iv</sup> —Cd2—O16 <sup>iv</sup>  | 54.2 (3)  | O4—Cd2—C44 <sup>iv</sup>                  | 104.7 (4) |
| O15 <sup>iv</sup> —Cd2—O18 <sup>iii</sup> | 96.3 (3)  | O17 <sup>v</sup> —Cd2—O3                  | 86.7 (3)  |
| O15 <sup>iv</sup> —Cd2—C44 <sup>iv</sup>  | 27.0 (3)  | O17 <sup>v</sup> —Cd2—O4                  | 135.1 (3) |
| O16 <sup>iv</sup> —Cd2—O4                 | 103.0 (3) | O17 <sup>v</sup> —Cd2—O15 <sup>iv</sup>   | 121.9 (3) |
| O16 <sup>iv</sup> —Cd2—C44 <sup>iv</sup>  | 27.2 (3)  | O17 <sup>v</sup> —Cd2—O16 <sup>iv</sup>   | 95.1 (3)  |
| O17 <sup>v</sup> —Cd2—O18 <sup>iii</sup>  | 102.7 (3) | O18 <sup>iii</sup> —Cd2—O16 <sup>iv</sup> | 150.4 (3) |
| O17 <sup>v</sup> —Cd2—C44 <sup>iv</sup>   | 109.6 (4) | O18 <sup>iii</sup> —Cd2—O4                | 80.8 (3)  |

Symmetry codes: (i)  $x+1, y, z$ ; (ii)  $x, y-1, z$ ; (iii)  $x-1, y, z$ ; (iv)  $x, y+1, z$ ; (v)  $-x+2, -y+2, -z+1$ .

|                          |             |                        |             |
|--------------------------|-------------|------------------------|-------------|
| Mn1—O1                   | 2.163 (3)   | Mn1—O8                 | 2.273 (3)   |
| Mn1—O6 <sup>i</sup>      | 2.156 (3)   | Mn1—O9                 | 2.155 (3)   |
| Mn1—O7                   | 2.157 (3)   | Mn1—O10                | 2.166 (3)   |
| O1—Mn1—O8                | 81.15 (10)  | O7—Mn1—O10             | 88.72 (11)  |
| O1—Mn1—O10               | 173.80 (10) | O9—Mn1—O1              | 94.40 (10)  |
| O6 <sup>i</sup> —Mn1—O1  | 95.12 (10)  | O9—Mn1—O6 <sup>i</sup> | 86.05 (11)  |
| O6 <sup>i</sup> —Mn1—O7  | 93.76 (11)  | O9—Mn1—O7              | 178.42 (11) |
| O6 <sup>i</sup> —Mn1—O8  | 172.95 (11) | O9—Mn1—O8              | 88.27 (11)  |
| O6 <sup>i</sup> —Mn1—O10 | 89.79 (11)  | O9—Mn1—O10             | 89.71 (11)  |
| O7—Mn1—O1                | 87.18 (10)  | O10—Mn1—O8             | 94.36 (12)  |
| O7—Mn1—O8                | 92.04 (12)  |                        |             |

Symmetry codes: (i)  $x, y, z+1$ ; (ii)  $x, y, z-1$ .
